# Supplementary material
Source: PubMed Central journal article supplement (PMC1851068)

Vehicle

Wnt3a

Wnt3a+Fz8-CRD

Nkx6.1/Ki67

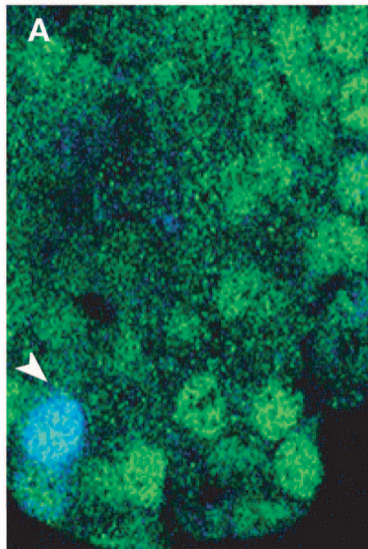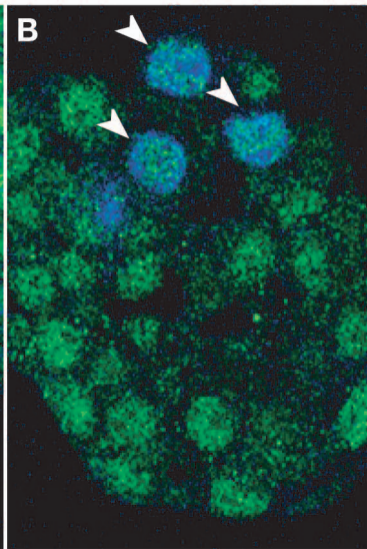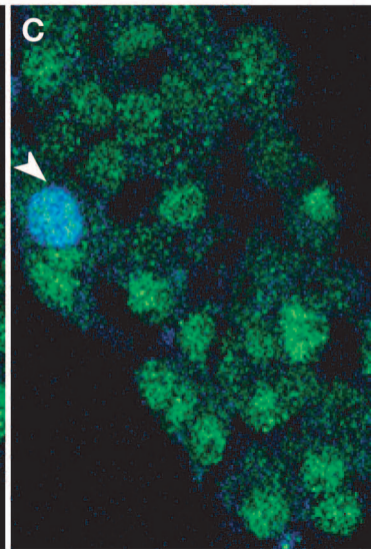

Supplement: pnas_0701509104_1.pdf [file pnas_0701509104_1.pdf]

□ Veh    ■ Wnt    ■ Wnt+Fz8

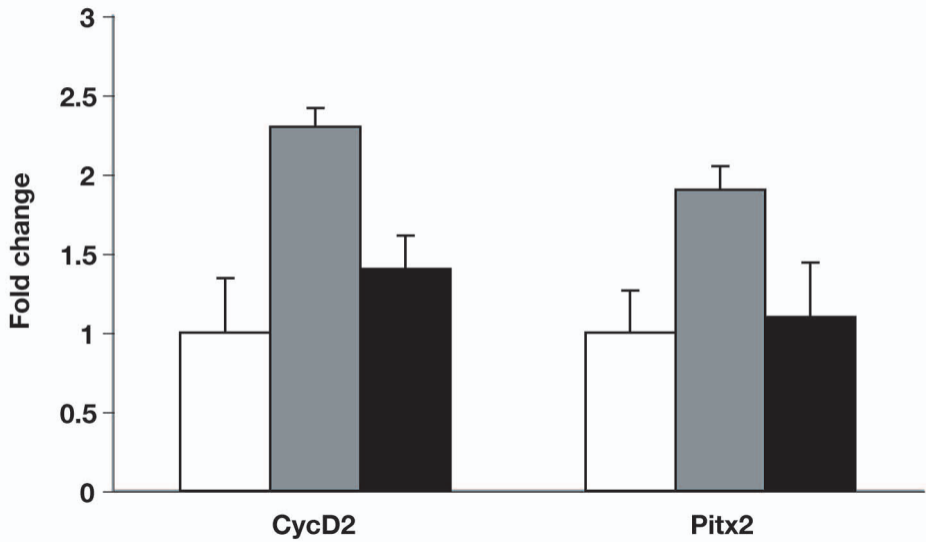

Supplement: pnas_0701509104_2.pdf [file pnas_0701509104_2.pdf]

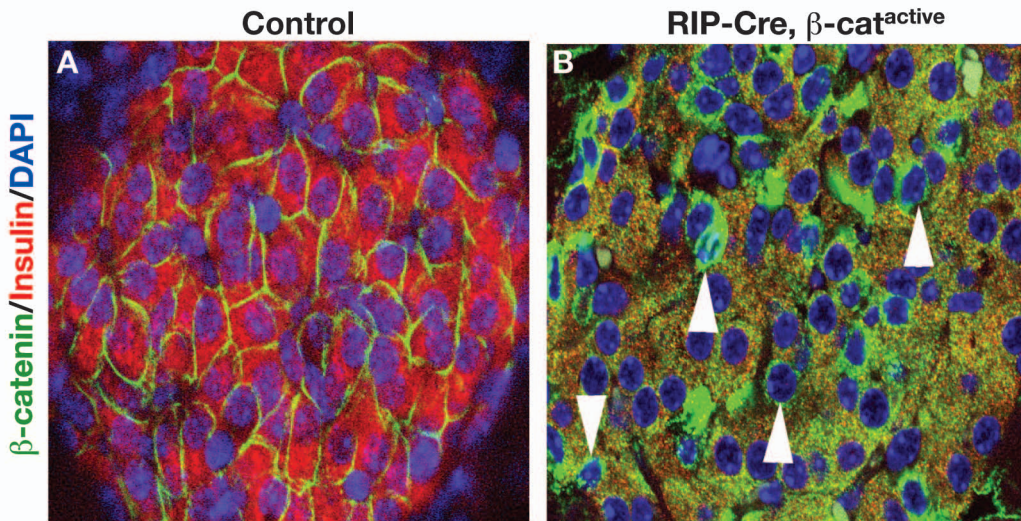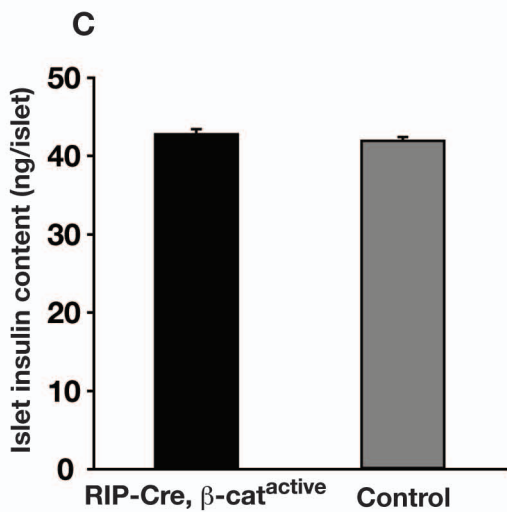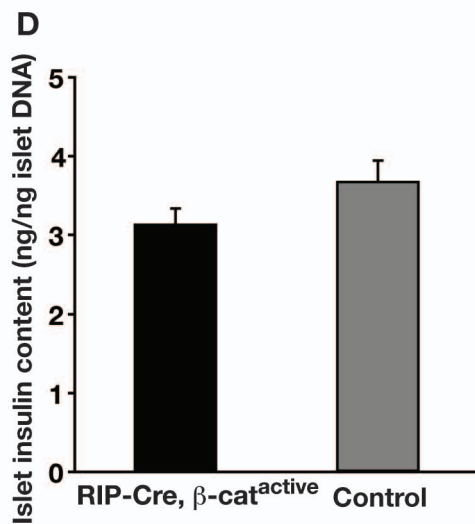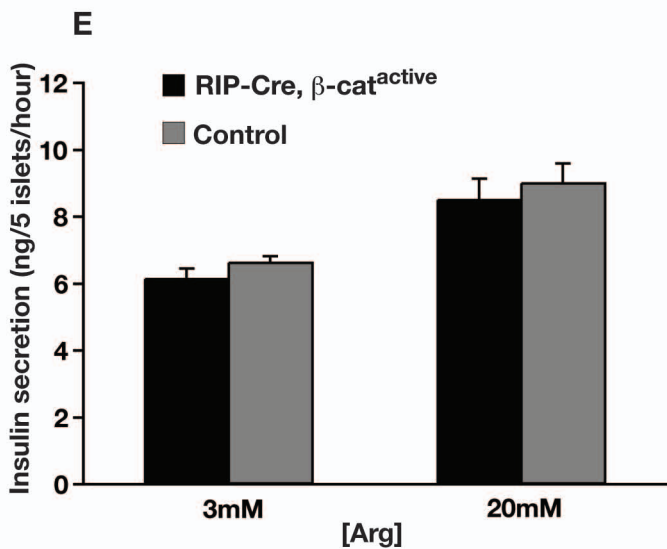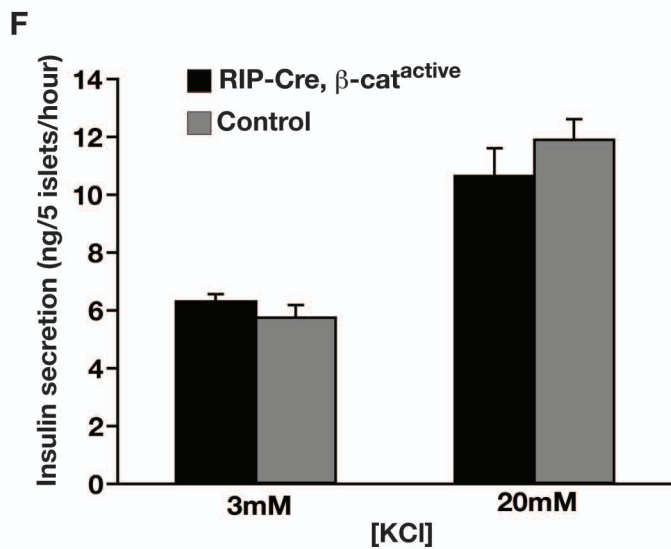

Supplement: pnas_0701509104_3.pdf [file pnas_0701509104_3.pdf]

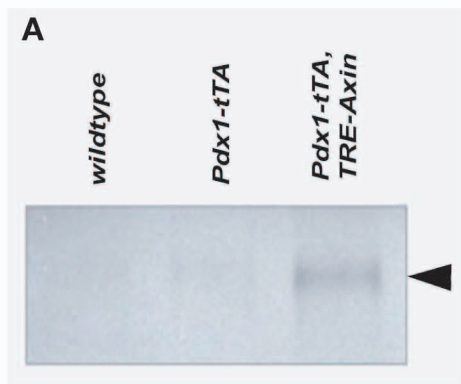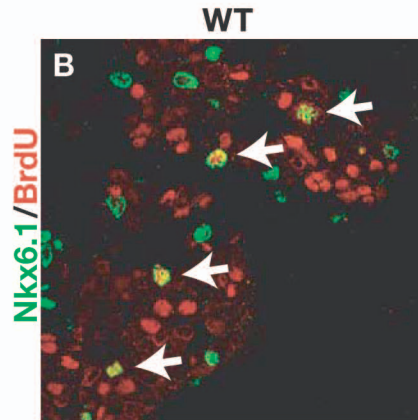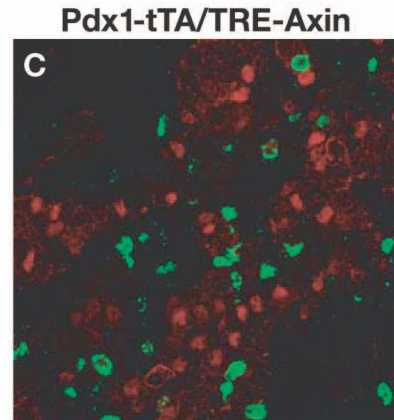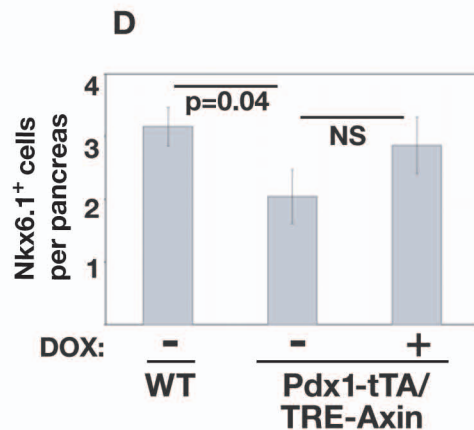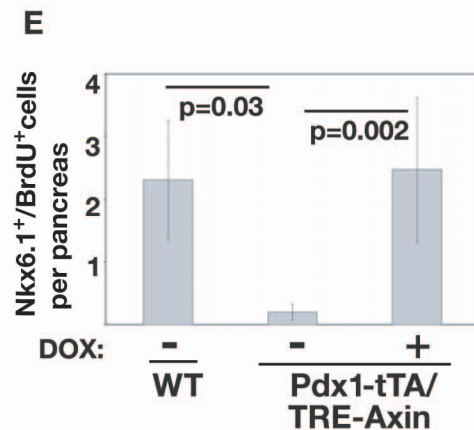

Supplement: pnas_0701509104_4.pdf [file pnas_0701509104_4.pdf]

P28

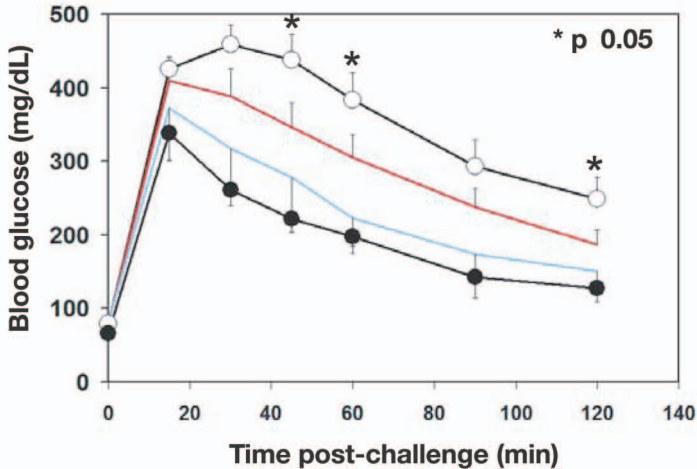

Supplement: pnas_0701509104_5.pdf [file pnas_0701509104_5.pdf]
